# Supplementary material for: Interrogating the Diversity of Vaginal, Endometrial, and Fecal Microbiomes in Healthy and Metritis Dairy Cattle
Source: Animals (Basel). 2023 Mar 31;13(7):1221. doi: 10.3390/ani13071221 (PMC10093325; doi:10.3390/ani13071221)
Supplement: Supplementary file 1 [file animals-13-01221-s001.zip › Supplementary Material_Tasara et al.xlsx]

## Sheet: Table S1
Supplementary Table S1. Showing the relative abundances for the 50 topmost abundant bacterial taxa
OTU	Phylum	Class	Order	Family	Genus	FH	FM	VH	VM	D1H	D1M	D4H	D4M	D7H	D7M	D10H	D10M	D21H	D21M
OTU541	Actinobacteriota	Actinobacteria	Actinomycetales	Actinomycetaceae	Trueperella	0	0	0.0263548	0.0155029	0.127936	0.0663394	0.0119449	2.3848	3.66657	16.6169	6.29059	24.0448	0.930816	5.51355
OTU1324	Actinobacteriota	Actinobacteria	Micrococcales	Micrococcaceae	Kocuria	0	0	1.33865	0.909733	1.15606	0.200887	0.00497652	0.158181	0	0	0.0647785	0	1.70196	1.09805
OTU4524	Actinobacteriota	Actinobacteria	Corynebacteriales	Corynebacteriaceae	Corynebacterium	0	0	1.70483	1.28333	0.335053	0.0559557	0.063823	0.794777	0.256065	0.219006	0.0577997	0.00229346	0.567126	0.585471
OTU4440	Actinobacteriota	Actinobacteria	Micrococcales	Dermabacteraceae	Brachybacterium	0	0	1.42331	0.526833	0.101139	0.0842048	0.0330729	0.0713154	0.00785385	0	0.02291	0.0155925	1.55847	0.338577
OTU985	Bacteroidota	Bacteroidia	Bacteroidales	Prevotellaceae	Prevotellaceae	15.7538	12.9741	2.41145	3.338	1.64789	1.7766	0.216586	0.689343	0.31115	0.0243563	0.0999127	0.435342	0.548017	0.699652
OTU3828	Bacteroidota	Bacteroidia	Bacteroidales	Bacteroidaceae	Bacteroides	9.16683	7.90733	1.28201	2.21483	0.740947	0.477259	0.202603	0.349354	0.232368	5.28799	0.119874	2.84465	0.304616	2.85849
OTU4562	Bacteroidota	Bacteroidia	Bacteroidales	Rikenellaceae	Rikenellaceae	8.0598	6.92541	1.21854	1.98027	0.59994	0.342456	0.0658739	0.143372	0.10276	0.00974252	0.0306972	0.185378	0.206938	0.295382
OTU4402	Bacteroidota	Bacteroidia	Bacteroidales	Porphyromonadaceae	Porphyromonas	0	0	0.0329364	0.0767405	0	0	0.0170195	0.111966	0.753082	6.66253	0.756496	4.36229	0.030316	4.12725
OTU508	Bacteroidota	Bacteroidia	Bacteroidales	Muribaculaceae	uncultured	3.7255	4.50501	0.157369	0.714393	0.26579	0.205361	0.03234	0.0977431	0.0776343	0.00171468	0.0518158	0.13111	0.393307	0.136309
OTU3422	Bacteroidota	Bacteroidia	Bacteroidales	Rikenellaceae	Alistipes	3.12518	3.21169	0.65513	0.824027	0.376721	0.382123	0.00840224	0.124659	0.0624461	0	0.0153343	0.0335066	0.110826	0.228453
OTU1547	Bacteroidota	Bacteroidia	Flavobacteriales	Flavobacteriaceae	Flavobacterium	0.181729	0	2.44075	2.40273	0.602013	0.801519	0.123582	0.121992	0.0413075	0.025659	0.0363935	0.010395	0.921849	0.202894
OTU3243	Bacteroidota	Bacteroidia	Bacteroidales	Prevotellaceae	Alloprevotella	0.997707	1.60702	0.541047	0.698596	0.419711	0.493732	0.071786	0.0688044	0.0406922	0.0104384	0.0229674	0.111771	0.207329	0.157288
OTU2685	Bacteroidota	Bacteroidia	Bacteroidales	Muribaculaceae	NA	2.17815	2.11347	0.159312	0.406139	0.186542	0.0149641	0.0348232	0.0454961	0	0	0.00398759	0.0597713	0.0658198	0.138391
OTU2967	Bacteroidota	Bacteroidia	Bacteroidales	p-2534-18B5	NA	1.8626	2.59783	0.0810528	0.253523	0.088287	0.0831005	0.0313412	0.0365697	0.000420799	0	0.0108429	0	0.00800375	0.0404913
OTU609	Bacteroidota	Bacteroidia	Bacteroidales	Prevotellaceae	Prevotella	1.61116	1.45741	0.233153	0.668593	0.21796	0.228361	0.0290244	0.0637804	0.104223	0	0.0293129	0.0857588	0.0861545	0.155698
OTU4273	Bacteroidota	Bacteroidia	Bacteroidales	NA	NA	0.00937551	0.0993608	0.0378916	0.100567	0.0519353	0	0.0419398	0.0092925	0.00324386	0.000986745	0.0132349	0	4.50448	0
OTU2277	Bacteroidota	Bacteroidia	Flavobacteriales	Weeksellaceae	Bergeyella	0	0	0.0331906	0.00718333	0	0	0	0.0733239	1.58222	0.244898	2.69078	0.0189946	0	0
OTU2712	Campylobacterota	Campylobacteria	Campylobacterales	Campylobacteraceae	Campylobacter	0	0.00208812	0.0102534	0.0386669	0	0.030813	0	0	2.17386	0	3.68093	0	0	0.117793
OTU3255	Cyanobacteria	Cyanobacteriia	Chloroplast	Epipyxis	NA	0	0	0	0	0	0	0.508143	0.44535	0.454089	0	0.516512	0.261041	1.59513	1.24933
OTU4266	Firmicutes	Bacilli	Lactobacillales	Streptococcaceae	Streptococcus	0.108526	0.0199683	5.63244	4.54095	1.93307	11.6137	21.3604	13.1712	4.73949	11.8073	5.42225	8.79277	1.9499	2.23902
OTU3419	Firmicutes	Clostridia	Clostridiales	Clostridiaceae	Clostridium	1.07004	2.05962	0.578786	0.300844	0.437517	13.0136	5.51641	18.9073	8.56314	6.98368	0.869956	0.401663	0.229205	0.352597
OTU776	Firmicutes	Bacilli	Mycoplasmatales	Mycoplasmataceae	Ureaplasma	0.00319761	0	7.06708	2.40154	4.25144	0.356705	3.98557	2.97229	5.50771	4.63772	3.15556	3.88612	15.9818	1.84368
OTU3663	Firmicutes	Clostridia	Oscillospirales	Oscillospiraceae	UCG-005	6.71678	6.20433	5.56162	4.79267	2.72282	2.0371	0.531961	0.920037	0.536846	0.105508	0.269599	0.593148	0.41258	1.58639
OTU4218	Firmicutes	Clostridia	Peptostreptococcales-Tissierellales	Family	NA_Firmicutes	0.124383	0.148855	0.0828327	0.843428	0.106492	0.17899	0.0346783	2.10331	2.54415	5.47418	1.99027	8.23743	1.34169	5.6823
OTU4346	Firmicutes	Bacilli	Staphylococcales	Staphylococcaceae	Staphylococcus	0	0	3.43592	7.29287	2.10267	0.375302	0.125361	0.912091	0.0341505	0.018984	0.0802805	0.122821	0.963208	2.0146
OTU172	Firmicutes	Clostridia	Lachnospirales	Lachnospiraceae	NA_Firmicutes	0.932267	0.917672	1.87896	1.71265	0.951597	1.28958	0.21297	0.416126	0.225551	3.08349	0.146397	2.45865	0.587376	0.504549
OTU5045	Firmicutes	Bacilli	Mycoplasmatales	Mycoplasmataceae	Mycoplasma	0	0	0	0	0	0.11408	0.0928742	0.307493	0.901047	2.40189	0.667161	1.64993	0.293694	5.84681
OTU2500	Firmicutes	Bacilli	Lactobacillales	Enterococcaceae	Enterococcus	0	0.0119393	0.394245	1.02389	0	0.415263	0.00684271	2.00677	0.0141346	4.70436	0	3.55486	0.0149936	0.0168877
OTU171	Firmicutes	Clostridia	Christensenellales	Christensenellaceae	Christensenellaceae	1.47382	1.78516	1.32016	1.12755	0.659376	0.45257	0.0773415	0.141407	0.0902511	0.0173974	0.143278	0.170221	0.0970641	0.270543
OTU4994	Firmicutes	Clostridia	Peptostreptococcales-Tissierellales	Peptostreptococcaceae	Romboutsia	0.326087	0.193802	1.64018	1.94049	0.683113	0.591595	0.13307	0.313107	0.174047	0.000869414	0.187012	0.136001	0.325362	0.591018
OTU2801	Firmicutes	Negativicutes	Acidaminococcales	Acidaminococcaceae	Phascolarctobacterium	1.21915	1.61246	0.964369	1.04217	0.44695	0.532947	0.0860626	0.12577	0.0634541	0.0111343	0.0676319	0.0831601	0.152507	0.233809
OTU2994	Firmicutes	Clostridia	Oscillospirales	UCG-010	uncultured	1.32963	0.942606	1.2861	1.32416	0.599034	0.435611	0.0402445	0.085175	0.108893	0	0.0214687	0.0402825	0.126842	0.201116
OTU3818	Firmicutes	Bacilli	Staphylococcales	Staphylococcaceae	Jeotgalicoccus	0	0	2.68364	0.574147	0.0164106	0.184424	0.0056243	0.120584	0.0108021	0	0.260812	0	0.39343	0.314665
OTU316	Fusobacteriota	Fusobacteriia	Fusobacteriales	Fusobacteriaceae	Fusobacterium	0	0	0.0376979	0.145008	0	0.105075	0.11346	0.0459662	10.8284	9.61996	19.8629	15.829	6.03987	5.06763
OTU4522	Fusobacteriota	Fusobacteriia	Fusobacteriales	Leptotrichiaceae	Caviibacter	0	0	0.0113772	0.000758175	0	0.244129	0.230164	0	0.995203	2.78513	8.43036	10.4498	0.0244349	0.0823874
OTU3814	Fusobacteriota	Fusobacteriia	Fusobacteriales	Leptotrichiaceae	Oceanivirga	0	0	0	0	0	0	0.0321276	9.51536	0	3.07766	0.0027496	2.56799	0.0311272	3.72069
OTU2422	Proteobacteria	Gammaproteobacteria	Enterobacterales	NA	NA_Proteobacteria	1.39031	0	2.065	4.60683	35.8619	34.4924	28.9287	13.0249	17.9124	6.35191	13.6406	2.49918	29.5173	29.6603
OTU382	Proteobacteria	Gammaproteobacteria	Enterobacterales	Pasteurellaceae	Mannheimia	0	0	0.147411	0.22941	17.2117	0.0328358	11.4819	0.705778	7.96379	0	8.43866	0	0.0178495	0
OTU14	Proteobacteria	Gammaproteobacteria	Enterobacterales	Pasteurellaceae	Pasteurella	0	0	0.646681	0	1.3838	0	16.8773	0	16.3342	0	8.17166	0.00476727	0.100024	0.859684
OTU2860	Proteobacteria	Gammaproteobacteria	Enterobacterales	Pasteurellaceae	Histophilus	0	0	0.0364413	0.848715	0.0108421	5.44273	0.234812	15.5352	1.13758	5.61336	1.41549	1.42048	0.320018	4.53962
OTU4556	Proteobacteria	Gammaproteobacteria	Pseudomonadales	Pseudomonadaceae	Pseudomonas	1.76013	1.54279	6.40036	0.283361	0.335405	0.405648	1.1735	0.161147	0.678765	0	0.211885	0.693166	1.86287	1.15156
OTU3780	Proteobacteria	Gammaproteobacteria	Pseudomonadales	Moraxellaceae	Psychrobacter	0	0.0989134	6.45737	2.35211	0.531235	0.846672	0.250591	0.746459	0.179361	0	0.181938	0.275071	1.8816	0.56055
OTU12	Proteobacteria	Gammaproteobacteria	Pseudomonadales	Moraxellaceae	Acinetobacter	0.753703	0.237542	3.41299	1.04889	2.99191	0.579539	0.0581406	0.19125	0.0795756	0.0290798	0.55102	0.0861975	0.975866	0.498231
OTU2864	Proteobacteria	Alphaproteobacteria	Acetobacterales	Acetobacteraceae	Acetobacter	0.0485047	0.0197585	0.192719	0.6614	1.28325	2.37633	1.47266	1.46877	0.471145	0.421164	0.160594	0	0.433386	1.3143
OTU2996	Proteobacteria	Gammaproteobacteria	Enterobacterales	Enterobacteriaceae	Escherichia-Shigella	0	0.266933	0.26673	2.04567	0.0994188	0.375348	0.0396792	2.85157	0.383939	1.49677	2.05135	0.0694785	0.173767	0.077837
OTU278	Proteobacteria	Gammaproteobacteria	Enterobacterales	Enterobacteriaceae	Klebsiella	0	0	0	0	0	0	0	0	5.23799	0	3.29154	0	0	0
OTU3792	Proteobacteria	Alphaproteobacteria	Acetobacterales	Acetobacteraceae	Acidocella	0	0	0	0.166001	0.347247	1.71691	1.20855	0.0762795	0.664092	0	0.103289	0	0.944525	0.778084
OTU2078	Spirochaetota	Spirochaetia	Spirochaetales	Spirochaetaceae	Treponema	2.91743	2.96284	0.197826	0.413669	0.278396	0.291022	0.00630449	0.0805408	0.0323379	0.00756668	0.0337105	0.0259875	0.157768	0.0704112
OTU3510	Verrucomicrobiota	Verrucomicrobiae	Verrucomicrobiales	Akkermansiaceae	Akkermansia	1.48025	2.05609	0.701219	0.330051	0.114161	0.044725	0.0315284	0.00634607	0.0182782	0.00417537	0.0299135	0.120439	0.0042822	0.0377633

## Sheet: Table S2
Supplementary Table S2: . Analysis of similarity (ANOSIM) for comparisons of microbial communities in both healthy and metritic based on Bray-Curtis dissimilarity
	Repeated-Measures ANOVA	Sum Sq	Error SS	F value	Pr(>F)
	Healthy Cattle - all timepoints	49.484	4802.7	10.396	0.001303 **
	Metritic Cattle - all timepoints	49.419	3476.2	14.344	0.0001612 ***
	Statistical significance: *** P>0; **P>0.001

## Sheet: Table S3-Figure 5A-B
Supplementary Table S3. Showing OTUs compriging the postpartum uterine core microbiomes in M and H cows at genus level
OTUs comprising the postpartum uterine core genera of M cows	OTU	Kingdom	Phylum	Class	Order	Family	Genus		OTUs comprising the postpartum uterine core genera of H cows	OTU	Phylum	Class	Order	Family	Genus
	OTU94	Bacteria	Spirochaetota	Spirochaetia	Spirochaetales	Spirochaetaceae	Treponema			OTU94	Spirochaetota	Spirochaetia	Spirochaetales	Spirochaetaceae	Treponema
	OTU4262	Bacteria	Firmicutes	Negativicutes	Acidaminococcales	Acidaminococcaceae	Phascolarctobacterium			OTU4593	Firmicutes	Clostridia	Oscillospirales	UCG-010	uncultured
	OTU4878	Bacteria	Firmicutes	Clostridia	Oscillospirales	Oscillospiraceae	UCG-005			OTU3037	Firmicutes	Clostridia	Peptostreptococcales-Tissierellales	Anaerovoracaceae	Family
	OTU2407	Bacteria	Bacteroidota	Bacteroidia	Bacteroidales	Rikenellaceae	Rikenellaceae			OTU1783	Bacteroidota	Bacteroidia	Bacteroidales	p-2534-18B5	NA
	OTU4655	Bacteria	Firmicutes	Clostridia	Clostridiales	Clostridiaceae	Clostridium			OTU4262	Firmicutes	Negativicutes	Acidaminococcales	Acidaminococcaceae	Phascolarctobacterium
	OTU75	Archaea	Euryarchaeota	Methanobacteria	Methanobacteriales	Methanobacteriaceae	Methanobrevibacter			OTU1371	Bacteroidota	Bacteroidia	Bacteroidales	Rikenellaceae	Alistipes
	OTU1732	Bacteria	Bacteroidota	Bacteroidia	Bacteroidales	Bacteroidales	NA			OTU2796	Firmicutes	Bacilli	RF39	uncultured	NA
	OTU1213	Bacteria	Bacteroidota	Bacteroidia	Bacteroidales	Prevotellaceae	Alloprevotella			OTU4878	Firmicutes	Clostridia	Oscillospirales	Oscillospiraceae	UCG-005
	OTU1738	Bacteria	Bacteroidota	Bacteroidia	Bacteroidales	Muribaculaceae	uncultured			OTU2407	Bacteroidota	Bacteroidia	Bacteroidales	Rikenellaceae	Rikenellaceae
	OTU1597	Bacteria	Bacteroidota	Bacteroidia	Bacteroidales	Prevotellaceae	Prevotellaceae			OTU4655	Firmicutes	Clostridia	Clostridiales	Clostridiaceae	Clostridium
	OTU587	Bacteria	Verrucomicrobiota	Verrucomicrobiae	Verrucomicrobiales	Akkermansiaceae	Akkermansia			OTU3335	Firmicutes	Clostridia	Christensenellales	Christensenellaceae	Christensenellaceae
	OTU1488	Bacteria	Bacteroidota	Bacteroidia	Bacteroidales	Bacteroidaceae	Bacteroides			OTU4937	Firmicutes	Clostridia	Peptostreptococcales-Tissierellales	Anaerovoracaceae	Mogibacterium
	OTU4440	Bacteria	Firmicutes	Clostridia	Oscillospirales	[Eubacterium]	NA			OTU75	Euryarchaeota	Methanobacteria	Methanobacteriales	Methanobacteriaceae	Methanobrevibacter
	OTU2672	Bacteria	Firmicutes	Clostridia	Clostridia	NA	NA			OTU1732	Bacteroidota	Bacteroidia	Bacteroidales	Bacteroidales	NA
	OTU3578	Bacteria	Firmicutes	Clostridia	Peptostreptococcales-Tissierellales	Peptostreptococcaceae	Romboutsia			OTU1213	Bacteroidota	Bacteroidia	Bacteroidales	Prevotellaceae	Alloprevotella
	OTU3335	Bacteria	Firmicutes	Clostridia	Christensenellales	Christensenellaceae	Christensenellaceae			OTU1738	Bacteroidota	Bacteroidia	Bacteroidales	Muribaculaceae	uncultured
	OTU3103	Bacteria	Firmicutes	Clostridia	Lachnospirales	Lachnospiraceae	NA			OTU1620	Bacteroidota	Bacteroidia	Bacteroidales	uncultured	uncultured
	OTU2657	Bacteria	Firmicutes	Clostridia	Oscillospirales	Oscillospiraceae	NK4A214			OTU2838	Firmicutes	Clostridia	Oscillospirales	Ruminococcaceae	uncultured
	OTU3717	Bacteria	Firmicutes	Clostridia	NA	NA	NA			OTU1597	Bacteroidota	Bacteroidia	Bacteroidales	Prevotellaceae	Prevotellaceae
	OTU4049	Bacteria	Firmicutes	Bacilli	Erysipelotrichales	Erysipelotrichaceae	Turicibacter			OTU3103	Firmicutes	Clostridia	Lachnospirales	Lachnospiraceae	NA
	OTU4116	Bacteria	Firmicutes	Clostridia	Oscillospirales	Oscillospiraceae	uncultured			OTU1210	Bacteroidota	Bacteroidia	Bacteroidales	Prevotellaceae	Prevotella
	OTU3171	Bacteria	Firmicutes	Clostridia	Lachnospirales	Lachnospiraceae	Dorea			OTU1488	Bacteroidota	Bacteroidia	Bacteroidales	Bacteroidaceae	Bacteroides
	OTU3575	Bacteria	Firmicutes	Clostridia	Peptostreptococcales-Tissierellales	Peptostreptococcaceae	Paeniclostridium			OTU4440	Firmicutes	Clostridia	Oscillospirales	[Eubacterium]	NA
	OTU473	Bacteria	Proteobacteria	Gammaproteobacteria	Pseudomonadales	Moraxellaceae	Acinetobacter			OTU1701	Bacteroidota	Bacteroidia	Bacteroidales	Paludibacteraceae	NA
	OTU4937	Bacteria	Firmicutes	Clostridia	Peptostreptococcales-Tissierellales	Anaerovoracaceae	Mogibacterium			OTU566	Verrucomicrobiota	Kiritimatiellae	WCHB1-41	uncultured	NA
	OTU1516	Bacteria	Bacteroidota	Bacteroidia	Bacteroidales	Paludibacteraceae	uncultured			OTU2401	Cyanobacteria	Vampirivibrionia	Gastranaerophilales	uncultured	NA
	OTU3721	Bacteria	Actinobacteriota	Actinobacteria	Bifidobacteriales	Bifidobacteriaceae	Bifidobacterium			OTU3575	Firmicutes	Clostridia	Peptostreptococcales-Tissierellales	Peptostreptococcaceae	Paeniclostridium
	OTU3488	Bacteria	NA	NA	NA	NA	NA			OTU2672	Firmicutes	Clostridia	Clostridia	NA	NA
	OTU2723	Bacteria	Firmicutes	Clostridia	Oscillospirales	Ruminococcaceae	Ruminococcus			OTU4049	Firmicutes	Bacilli	Erysipelotrichales	Erysipelotrichaceae	Turicibacter
	OTU1962	Bacteria	Proteobacteria	Gammaproteobacteria	Enterobacterales	Enterobacteriaceae	Escherichia-Shigella			OTU1123	Fibrobacterota	Fibrobacteria	Fibrobacterales	Fibrobacteraceae	Fibrobacter
	OTU3487	Bacteria	Firmicutes	Clostridia	Peptostreptococcales-Tissierellales	Family	NA			OTU587	Verrucomicrobiota	Verrucomicrobiae	Verrucomicrobiales	Akkermansiaceae	Akkermansia
	OTU3975	Bacteria	Firmicutes	Bacilli	Lactobacillales	Streptococcaceae	Streptococcus			OTU2723	Firmicutes	Clostridia	Oscillospirales	Ruminococcaceae	Ruminococcus
	OTU4485	Bacteria	Firmicutes	Bacilli	Lactobacillales	Enterococcaceae	Enterococcus			OTU3578	Firmicutes	Clostridia	Peptostreptococcales-Tissierellales	Peptostreptococcaceae	Romboutsia
	OTU1954	Bacteria	Proteobacteria	Gammaproteobacteria	Enterobacterales	Yersiniaceae	Yersinia			OTU899	Proteobacteria	Alphaproteobacteria	Acetobacterales	Acetobacteraceae	Acetobacter
	OTU1324	Bacteria	Bacteroidota	Bacteroidia	Flavobacteriales	Flavobacteriaceae	Flavobacterium			OTU452	Proteobacteria	Gammaproteobacteria	Pseudomonadales	Pseudomonadaceae	Pseudomonas
	OTU3880	Bacteria	Actinobacteriota	Actinobacteria	Micrococcales	Intrasporangiaceae	Janibacter			OTU3191	Firmicutes	Clostridia	Lachnospirales	Lachnospiraceae	Lachnoclostridium
	OTU3901	Bacteria	Actinobacteriota	Actinobacteria	Corynebacteriales	Corynebacteriaceae	Corynebacterium			OTU3033	Firmicutes	Clostridia	Peptostreptococcales-Tissierellales	Anaerovoracaceae	[Eubacterium]
	OTU2939	Bacteria	Actinobacteriota	Actinobacteria	Actinomycetales	Actinomycetaceae	Trueperella			OTU3975	Firmicutes	Bacilli	Lactobacillales	Streptococcaceae	Streptococcus
	OTU4070	Bacteria	Firmicutes	Bacilli	Staphylococcales	Staphylococcaceae	Staphylococcus			OTU473	Proteobacteria	Gammaproteobacteria	Pseudomonadales	Moraxellaceae	Acinetobacter
	OTU758	Bacteria	Firmicutes	Bacilli	Mycoplasmatales	Mycoplasmataceae	Mycoplasma			OTU3075	Firmicutes	Clostridia	Lachnospirales	Lachnospiraceae	Lachnospiraceae
	OTU1011	Bacteria	Proteobacteria	Gammaproteobacteria	Xanthomonadales	Rhodanobacteraceae	Dyella			OTU3721	Actinobacteriota	Actinobacteria	Bifidobacteriales	Bifidobacteriaceae	Bifidobacterium
	OTU1941	Bacteria	Proteobacteria	Gammaproteobacteria	Enterobacterales	NA	NA			OTU3487	Firmicutes	Clostridia	Peptostreptococcales-Tissierellales	Family	NA
	OTU680	Bacteria	Firmicutes	Bacilli	Mycoplasmatales	Mycoplasmataceae	Ureaplasma			OTU2733	Firmicutes	Clostridia	Oscillospirales	Ruminococcaceae	NA
	OTU2203	Bacteria	Proteobacteria	Gammaproteobacteria	Enterobacterales	Pasteurellaceae	Histophilus			OTU4386	Firmicutes	Clostridia	Monoglobales	Monoglobaceae	Monoglobus
	OTU5131	Bacteria	Fusobacteriota	Fusobacteriia	Fusobacteriales	Fusobacteriaceae	Fusobacterium			OTU1324	Bacteroidota	Bacteroidia	Flavobacteriales	Flavobacteriaceae	Flavobacterium
										OTU2541	Firmicutes	Clostridia	Lachnospirales	Lachnospiraceae	Acetitomaculum
										OTU1954	Proteobacteria	Gammaproteobacteria	Enterobacterales	Yersiniaceae	Yersinia
										OTU1400	Bacteroidota	Bacteroidia	Sphingobacteriales	Sphingobacteriaceae	Pedobacter
										OTU1893	Proteobacteria	Gammaproteobacteria	Enterobacterales	Succinivibrionaceae	Succinivibrio
										OTU2488	Proteobacteria	Gammaproteobacteria	Enterobacterales	Yersiniaceae	Serratia
										OTU2311	Bacteroidota	Bacteroidia	Bacteroidales	NA	NA
										OTU1941	Proteobacteria	Gammaproteobacteria	Enterobacterales	NA	NA
										OTU680	Firmicutes	Bacilli	Mycoplasmatales	Mycoplasmataceae	Ureaplasma
										OTU3828	Actinobacteriota	Actinobacteria	Corynebacteriales	Dietziaceae	Dietzia
										OTU2883	Actinobacteriota	Actinobacteria	Micrococcales	Dermabacteraceae	Brachybacterium
										OTU882	Proteobacteria	Alphaproteobacteria	Rhizobiales	Beijerinckiaceae	Methylobacterium-Methylorubrum
										OTU3880	Actinobacteriota	Actinobacteria	Micrococcales	Intrasporangiaceae	Janibacter
										OTU3901	Actinobacteriota	Actinobacteria	Corynebacteriales	Corynebacteriaceae	Corynebacterium
										OTU893	Proteobacteria	Alphaproteobacteria	Acetobacterales	Acetobacteraceae	Acidocella
										OTU2464	Proteobacteria	Gammaproteobacteria	Enterobacterales	Pasteurellaceae	Pasteurella
										OTU4507	Firmicutes	Bacilli	Lactobacillales	Lactobacillaceae	Lactobacillus
										OTU1145	Patescibacteria	Parcubacteria	Candidatus	NA	NA
										OTU1793	Proteobacteria	Alphaproteobacteria	Sphingomonadales	Sphingomonadaceae	Sphingomonas
										OTU2939	Actinobacteriota	Actinobacteria	Actinomycetales	Actinomycetaceae	Trueperella
										OTU3687	Proteobacteria	Gammaproteobacteria	Burkholderiales	Oxalobacteraceae	Massilia
										OTU4516	Firmicutes	Bacilli	Lactobacillales	Carnobacteriaceae	uncultured
										OTU895	Proteobacteria	Alphaproteobacteria	Acetobacterales	Acetobacteraceae	NA
										OTU3417	Actinobacteriota	Coriobacteriia	Coriobacteriales	Atopobiaceae	Olsenella
										OTU4070	Firmicutes	Bacilli	Staphylococcales	Staphylococcaceae	Staphylococcus
										OTU4531	Firmicutes	Bacilli	Lactobacillales	Aerococcaceae	Aerococcus
										OTU1011	Proteobacteria	Gammaproteobacteria	Xanthomonadales	Rhodanobacteraceae	Dyella
										OTU2043	Bacteroidota	Bacteroidia	Chitinophagales	Saprospiraceae	uncultured
										OTU2482	Proteobacteria	Gammaproteobacteria	Enterobacterales	Pasteurellaceae	Mannheimia
										OTU407	Proteobacteria	Gammaproteobacteria	Pseudomonadales	Moraxellaceae	Psychrobacter
										OTU2203	Proteobacteria	Gammaproteobacteria	Enterobacterales	Pasteurellaceae	Histophilus
										OTU4067	Firmicutes	Bacilli	Staphylococcales	Staphylococcaceae	Jeotgalicoccus
										OTU4002	Firmicutes	Bacilli	Lactobacillales	Carnobacteriaceae	Atopostipes
										OTU1962	Proteobacteria	Gammaproteobacteria	Enterobacterales	Enterobacteriaceae	Escherichia-Shigella

## Sheet: Table S4-Figure 5C
Supplementary Table S4. Showing genus OTU distribution between core uterine microbiomes found in M and H cows
Genus OTUs shared genera between M and H cow core uterine microbiomes.	OTU	Phylum	Class	Order	Family	Genus		Genus OTUs found in the M but not H uterine core microbiome.	OTU	Phylum	Class	Order	Family	Genus	Genus OTUs found in the H but not M uterine core microbiome.	OTU	Kingdom	Phylum	Class	Order	Family	Genus
	OTU94	Spirochaetota	Spirochaetia	Spirochaetales	Spirochaetaceae	Treponema			OTU2657	Firmicutes	Clostridia	Oscillospirales	Oscillospiraceae	NK4A214		OTU4593	Bacteria	Firmicutes	Clostridia	Oscillospirales	UCG-010	uncultured
	OTU4262	Firmicutes	Negativicutes	Acidaminococcales	Acidaminococcaceae	Phascolarctobacterium			OTU3171	Firmicutes	Clostridia	Lachnospirales	Lachnospiraceae	Dorea		OTU1371	Bacteria	Bacteroidota	Bacteroidia	Bacteroidales	Rikenellaceae	Alistipes
	OTU4878	Firmicutes	Clostridia	Oscillospirales	Oscillospiraceae	UCG-005			OTU3717	Firmicutes	Clostridia	NA	NA	NA		OTU2796	Bacteria	Firmicutes	Bacilli	RF39	uncultured	NA
	OTU2407	Bacteroidota	Bacteroidia	Bacteroidales	Rikenellaceae	Rikenellaceae			OTU1516	Bacteroidota	Bacteroidia	Bacteroidales	Paludibacteraceae	uncultured		OTU1620	Bacteria	Bacteroidota	Bacteroidia	Bacteroidales	uncultured	uncultured
	OTU4655	Firmicutes	Clostridia	Clostridiales	Clostridiaceae	Clostridium			OTU4116	Firmicutes	Clostridia	Oscillospirales	Oscillospiraceae	uncultured		OTU2838	Bacteria	Firmicutes	Clostridia	Oscillospirales	Ruminococcaceae	uncultured
	OTU3335	Firmicutes	Clostridia	Christensenellales	Christensenellaceae	Christensenellaceae			OTU3488	NA	NA	NA	NA	NA		OTU1210	Bacteria	Bacteroidota	Bacteroidia	Bacteroidales	Prevotellaceae	Prevotella
	OTU4937	Firmicutes	Clostridia	Peptostreptococcales-Tissierellales	Anaerovoracaceae	Mogibacterium			OTU4485	Firmicutes	Bacilli	Lactobacillales	Enterococcaceae	Enterococcus		OTU1701	Bacteria	Bacteroidota	Bacteroidia	Bacteroidales	Paludibacteraceae	NA
	OTU1732	Bacteroidota	Bacteroidia	Bacteroidales	Bacteroidales	NA			OTU758	Firmicutes	Bacilli	Mycoplasmatales	Mycoplasmataceae	Mycoplasma		OTU566	Bacteria	Verrucomicrobiota	Kiritimatiellae	WCHB1-41	uncultured	NA
	OTU1213	Bacteroidota	Bacteroidia	Bacteroidales	Prevotellaceae	Alloprevotella			OTU5131	Fusobacteriota	Fusobacteriia	Fusobacteriales	Fusobacteriaceae	Fusobacterium		OTU2401	Bacteria	Cyanobacteria	Vampirivibrionia	Gastranaerophilales	uncultured	NA
	OTU1738	Bacteroidota	Bacteroidia	Bacteroidales	Muribaculaceae	uncultured										OTU1123	Bacteria	Fibrobacterota	Fibrobacteria	Fibrobacterales	Fibrobacteraceae	Fibrobacter
	OTU1597	Bacteroidota	Bacteroidia	Bacteroidales	Prevotellaceae	Prevotellaceae										OTU899	Bacteria	Proteobacteria	Alphaproteobacteria	Acetobacterales	Acetobacteraceae	Acetobacter
	OTU3103	Firmicutes	Clostridia	Lachnospirales	Lachnospiraceae	NA										OTU452	Bacteria	Proteobacteria	Gammaproteobacteria	Pseudomonadales	Pseudomonadaceae	Pseudomonas
	OTU1488	Bacteroidota	Bacteroidia	Bacteroidales	Bacteroidaceae	Bacteroides										OTU3191	Bacteria	Firmicutes	Clostridia	Lachnospirales	Lachnospiraceae	Lachnoclostridium
	OTU4440	Firmicutes	Clostridia	Oscillospirales	[Eubacterium]	NA										OTU3033	Bacteria	Firmicutes	Clostridia	Peptostreptococcales-Tissierellales	Anaerovoracaceae	[Eubacterium]
	OTU3575	Firmicutes	Clostridia	Peptostreptococcales-Tissierellales	Peptostreptococcaceae	Paeniclostridium										OTU3075	Bacteria	Firmicutes	Clostridia	Lachnospirales	Lachnospiraceae	Lachnospiraceae
	OTU2672	Firmicutes	Clostridia	Clostridia	NA	NA										OTU4386	Bacteria	Firmicutes	Clostridia	Monoglobales	Monoglobaceae	Monoglobus
	OTU4049	Firmicutes	Bacilli	Erysipelotrichales	Erysipelotrichaceae	Turicibacter										OTU2541	Bacteria	Firmicutes	Clostridia	Lachnospirales	Lachnospiraceae	Acetitomaculum
	OTU587	Verrucomicrobiota	Verrucomicrobiae	Verrucomicrobiales	Akkermansiaceae	Akkermansia										OTU1400	Bacteria	Bacteroidota	Bacteroidia	Sphingobacteriales	Sphingobacteriaceae	Pedobacter
	OTU2723	Firmicutes	Clostridia	Oscillospirales	Ruminococcaceae	Ruminococcus										OTU1893	Bacteria	Proteobacteria	Gammaproteobacteria	Enterobacterales	Succinivibrionaceae	Succinivibrio
	OTU3578	Firmicutes	Clostridia	Peptostreptococcales-Tissierellales	Peptostreptococcaceae	Romboutsia										OTU3828	Bacteria	Actinobacteriota	Actinobacteria	Corynebacteriales	Dietziaceae	Dietzia
	OTU3975	Firmicutes	Bacilli	Lactobacillales	Streptococcaceae	Streptococcus										OTU2883	Bacteria	Actinobacteriota	Actinobacteria	Micrococcales	Dermabacteraceae	Brachybacterium
	OTU473	Proteobacteria	Gammaproteobacteria	Pseudomonadales	Moraxellaceae	Acinetobacter										OTU882	Bacteria	Proteobacteria	Alphaproteobacteria	Rhizobiales	Beijerinckiaceae	Methylobacterium-Methylorubrum
	OTU3721	Actinobacteriota	Actinobacteria	Bifidobacteriales	Bifidobacteriaceae	Bifidobacterium										OTU893	Bacteria	Proteobacteria	Alphaproteobacteria	Acetobacterales	Acetobacteraceae	Acidocella
	OTU3487	Firmicutes	Clostridia	Peptostreptococcales-Tissierellales	Family	NA										OTU2464	Bacteria	Proteobacteria	Gammaproteobacteria	Enterobacterales	Pasteurellaceae	Pasteurella
	OTU1324	Bacteroidota	Bacteroidia	Flavobacteriales	Flavobacteriaceae	Flavobacterium										OTU4507	Bacteria	Firmicutes	Bacilli	Lactobacillales	Lactobacillaceae	Lactobacillus
	OTU1954	Proteobacteria	Gammaproteobacteria	Enterobacterales	Yersiniaceae	Yersinia										OTU1145	Bacteria	Patescibacteria	Parcubacteria	Candidatus	NA	NA
	OTU1941	Proteobacteria	Gammaproteobacteria	Enterobacterales	NA	NA										OTU1793	Bacteria	Proteobacteria	Alphaproteobacteria	Sphingomonadales	Sphingomonadaceae	Sphingomonas
	OTU680	Firmicutes	Bacilli	Mycoplasmatales	Mycoplasmataceae	Ureaplasma										OTU3687	Bacteria	Proteobacteria	Gammaproteobacteria	Burkholderiales	Oxalobacteraceae	Massilia
	OTU3880	Actinobacteriota	Actinobacteria	Micrococcales	Intrasporangiaceae	Janibacter										OTU4516	Bacteria	Firmicutes	Bacilli	Lactobacillales	Carnobacteriaceae	uncultured
	OTU3901	Actinobacteriota	Actinobacteria	Corynebacteriales	Corynebacteriaceae	Corynebacterium										OTU895	Bacteria	Proteobacteria	Alphaproteobacteria	Acetobacterales	Acetobacteraceae	NA
	OTU2939	Actinobacteriota	Actinobacteria	Actinomycetales	Actinomycetaceae	Trueperella										OTU3417	Bacteria	Actinobacteriota	Coriobacteriia	Coriobacteriales	Atopobiaceae	Olsenella
	OTU4070	Firmicutes	Bacilli	Staphylococcales	Staphylococcaceae	Staphylococcus										OTU4531	Bacteria	Firmicutes	Bacilli	Lactobacillales	Aerococcaceae	Aerococcus
	OTU1011	Proteobacteria	Gammaproteobacteria	Xanthomonadales	Rhodanobacteraceae	Dyella										OTU2043	Bacteria	Bacteroidota	Bacteroidia	Chitinophagales	Saprospiraceae	uncultured
	OTU2203	Proteobacteria	Gammaproteobacteria	Enterobacterales	Pasteurellaceae	Histophilus										OTU407	Bacteria	Proteobacteria	Gammaproteobacteria	Pseudomonadales	Moraxellaceae	Psychrobacter
	OTU1962	Proteobacteria	Gammaproteobacteria	Enterobacterales	Enterobacteriaceae	Escherichia-Shigella										OTU4067	Bacteria	Firmicutes	Bacilli	Staphylococcales	Staphylococcaceae	Jeotgalicoccus
																OTU4002	Bacteria	Firmicutes	Bacilli	Lactobacillales	Carnobacteriaceae	Atopostipes
																OTU3037	Bacteria	Firmicutes	Clostridia	Peptostreptococcales-Tissierellales	Anaerovoracaceae	Family
																OTU1783	Bacteria	Bacteroidota	Bacteroidia	Bacteroidales	p-2534-18B5	NA
																OTU2733	Bacteria	Firmicutes	Clostridia	Oscillospirales	Ruminococcaceae	NA
																OTU2488	Bacteria	Proteobacteria	Gammaproteobacteria	Enterobacterales	Yersiniaceae	Serratia
																OTU2311	Bacteria	Bacteroidota	Bacteroidia	Bacteroidales	NA	NA
																OTU2482	Bacteria	Proteobacteria	Gammaproteobacteria	Enterobacterales	Pasteurellaceae	Mannheimia

## Sheet: Table S5-Figure 6C
Supplementary Table S5. Genus OTUs shared between core uterine , vagina and fecal microbiomes
Genus OTUs shared between core uterine , vagina and fecal microbiomes in both M and H cows	OTU	Kingdom	Phylum	Class	Order	Family	Genus		Genus OTUs shared between core uterine , vagina and fecal microbiomes in M cows only	OTU	Kingdom	Phylum	Class	Order	Family	Genus	Genus OTUs shared between core uterine , vagina and fecal microbiomes in H cows only	OTU	Kingdom	Phylum	Class	Order	Family	Genus
	OTU94	Bacteria	Spirochaetota	Spirochaetia	Spirochaetales	Spirochaetaceae	Treponema			OTU2657	Bacteria	Firmicutes	Clostridia	Oscillospirales	Oscillospiraceae	NK4A214		OTU1324	Bacteria	Bacteroidota	Bacteroidia	Flavobacteriales	Flavobacteriaceae	Flavobacterium
	OTU4262	Bacteria	Firmicutes	Negativicutes	Acidaminococcales	Acidaminococcaceae	Phascolarctobacterium			OTU3171	Bacteria	Firmicutes	Clostridia	Lachnospirales	Lachnospiraceae	Dorea		OTU4593	Bacteria	Firmicutes	Clostridia	Oscillospirales	UCG-010	uncultured
	OTU4878	Bacteria	Firmicutes	Clostridia	Oscillospirales	Oscillospiraceae	UCG-005			OTU3717	Bacteria	Firmicutes	Clostridia	NA	NA	NA		OTU1371	Bacteria	Bacteroidota	Bacteroidia	Bacteroidales	Rikenellaceae	Alistipes
	OTU2407	Bacteria	Bacteroidota	Bacteroidia	Bacteroidales	Rikenellaceae	Rikenellaceae			OTU1516	Bacteria	Bacteroidota	Bacteroidia	Bacteroidales	Paludibacteraceae	uncultured		OTU2796	Bacteria	Firmicutes	Bacilli	RF39	uncultured	NA
	OTU4655	Bacteria	Firmicutes	Clostridia	Clostridiales	Clostridiaceae	Clostridium			OTU4116	Bacteria	Firmicutes	Clostridia	Oscillospirales	Oscillospiraceae	uncultured		OTU1620	Bacteria	Bacteroidota	Bacteroidia	Bacteroidales	uncultured	uncultured
	OTU3335	Bacteria	Firmicutes	Clostridia	Christensenellales	Christensenellaceae	Christensenellaceae			OTU3488	Bacteria	NA	NA	NA	NA	NA		OTU2838	Bacteria	Firmicutes	Clostridia	Oscillospirales	Ruminococcaceae	uncultured
	OTU4937	Bacteria	Firmicutes	Clostridia	Peptostreptococcales-Tissierellales	Anaerovoracaceae	Mogibacterium			OTU4485	Bacteria	Firmicutes	Bacilli	Lactobacillales	Enterococcaceae	Enterococcus		OTU1210	Bacteria	Bacteroidota	Bacteroidia	Bacteroidales	Prevotellaceae	Prevotella
	OTU75	Archaea	Euryarchaeota	Methanobacteria	Methanobacteriales	Methanobacteriaceae	Methanobrevibacter			OTU1962	Bacteria	Proteobacteria	Gammaproteobacteria	Enterobacterales	Enterobacteriaceae	Escherichia-Shigella		OTU1701	Bacteria	Bacteroidota	Bacteroidia	Bacteroidales	Paludibacteraceae	NA
	OTU1732	Bacteria	Bacteroidota	Bacteroidia	Bacteroidales	Bacteroidales	NA											OTU566	Bacteria	Verrucomicrobiota	Kiritimatiellae	WCHB1-41	uncultured	NA
	OTU1213	Bacteria	Bacteroidota	Bacteroidia	Bacteroidales	Prevotellaceae	Alloprevotella											OTU2401	Bacteria	Cyanobacteria	Vampirivibrionia	Gastranaerophilales	uncultured	NA
	OTU1738	Bacteria	Bacteroidota	Bacteroidia	Bacteroidales	Muribaculaceae	uncultured											OTU1123	Bacteria	Fibrobacterota	Fibrobacteria	Fibrobacterales	Fibrobacteraceae	Fibrobacter
	OTU1597	Bacteria	Bacteroidota	Bacteroidia	Bacteroidales	Prevotellaceae	Prevotellaceae											OTU899	Bacteria	Proteobacteria	Alphaproteobacteria	Acetobacterales	Acetobacteraceae	Acetobacter
	OTU3103	Bacteria	Firmicutes	Clostridia	Lachnospirales	Lachnospiraceae	NA											OTU452	Bacteria	Proteobacteria	Gammaproteobacteria	Pseudomonadales	Pseudomonadaceae	Pseudomonas
	OTU1488	Bacteria	Bacteroidota	Bacteroidia	Bacteroidales	Bacteroidaceae	Bacteroides											OTU3191	Bacteria	Firmicutes	Clostridia	Lachnospirales	Lachnospiraceae	Lachnoclostridium
	OTU4440	Bacteria	Firmicutes	Clostridia	Oscillospirales	[Eubacterium]	NA											OTU3033	Bacteria	Firmicutes	Clostridia	Peptostreptococcales-Tissierellales	Anaerovoracaceae	[Eubacterium]
	OTU3575	Bacteria	Firmicutes	Clostridia	Peptostreptococcales-Tissierellales	Peptostreptococcaceae	Paeniclostridium											OTU3075	Bacteria	Firmicutes	Clostridia	Lachnospirales	Lachnospiraceae	Lachnospiraceae
	OTU2672	Bacteria	Firmicutes	Clostridia	Clostridia	NA	NA											OTU4386	Bacteria	Firmicutes	Clostridia	Monoglobales	Monoglobaceae	Monoglobus
	OTU4049	Bacteria	Firmicutes	Bacilli	Erysipelotrichales	Erysipelotrichaceae	Turicibacter											OTU2541	Bacteria	Firmicutes	Clostridia	Lachnospirales	Lachnospiraceae	Acetitomaculum
	OTU587	Bacteria	Verrucomicrobiota	Verrucomicrobiae	Verrucomicrobiales	Akkermansiaceae	Akkermansia											OTU1400	Bacteria	Bacteroidota	Bacteroidia	Sphingobacteriales	Sphingobacteriaceae	Pedobacter
	OTU2723	Bacteria	Firmicutes	Clostridia	Oscillospirales	Ruminococcaceae	Ruminococcus											OTU1893	Bacteria	Proteobacteria	Gammaproteobacteria	Enterobacterales	Succinivibrionaceae	Succinivibrio
	OTU3578	Bacteria	Firmicutes	Clostridia	Peptostreptococcales-Tissierellales	Peptostreptococcaceae	Romboutsia											OTU3037	Bacteria	Firmicutes	Clostridia	Peptostreptococcales-Tissierellales	Anaerovoracaceae	Family
	OTU3975	Bacteria	Firmicutes	Bacilli	Lactobacillales	Streptococcaceae	Streptococcus											OTU1783	Bacteria	Bacteroidota	Bacteroidia	Bacteroidales	p-2534-18B5	NA
	OTU473	Bacteria	Proteobacteria	Gammaproteobacteria	Pseudomonadales	Moraxellaceae	Acinetobacter											OTU2733	Bacteria	Firmicutes	Clostridia	Oscillospirales	Ruminococcaceae	NA
	OTU3721	Bacteria	Actinobacteriota	Actinobacteria	Bifidobacteriales	Bifidobacteriaceae	Bifidobacterium											OTU2488	Bacteria	Proteobacteria	Gammaproteobacteria	Enterobacterales	Yersiniaceae	Serratia
	OTU3487	Bacteria	Firmicutes	Clostridia	Peptostreptococcales-Tissierellales	Family	NA											OTU2311	Bacteria	Bacteroidota	Bacteroidia	Bacteroidales	NA	NA
	OTU1954	Bacteria	Proteobacteria	Gammaproteobacteria	Enterobacterales	Yersiniaceae	Yersinia											OTU1941	Bacteria	Proteobacteria	Gammaproteobacteria	Enterobacterales	NA	NA
																		OTU680	Bacteria	Firmicutes	Bacilli	Mycoplasmatales	Mycoplasmataceae	Ureaplasma

## Sheet: Table S6-Figure 6D
Supplementary Table S6. Showing genus OTUs shared only between core uterine and vaginal microbiomes in M and H cows
Genus OTUs shared only between core uterine and vagina microbiomes in both M and H cows	OTU	Kingdom	Phylum	Class	Order	Family	Genus	Genus OTUs shared between core uterine and vagina microbiomes in M cows only	OTU	Kingdom	Phylum	Class	Order	Family	Genus	Genus OTUs shared between core uterine and vagina microbiomes in H cows only	OTU	Kingdom	Phylum	Class	Order	Family	Genus
	OTU3880	Bacteria	Actinobacteriota	Actinobacteria	Micrococcales	Intrasporangiaceae	Janibacter		OTU1941	Bacteria	Proteobacteria	Gammaproteobacteria	Enterobacterales	NA	NA		OTU882	Bacteria	Bacteroidota	Bacteroidia	Flavobacteriales	Flavobacteriaceae	Flavobacterium
	OTU3901	Bacteria	Actinobacteriota	Actinobacteria	Corynebacteriales	Corynebacteriaceae	Corynebacterium		OTU680	Bacteria	Firmicutes	Bacilli	Mycoplasmatales	Mycoplasmataceae	Ureaplasma		OTU407	Bacteria	Firmicutes	Clostridia	Oscillospirales	UCG-010	uncultured
	OTU2939	Bacteria	Actinobacteriota	Actinobacteria	Actinomycetales	Actinomycetaceae	Trueperella		OTU5131	Bacteria	Fusobacteriota	Fusobacteriia	Fusobacteriales	Fusobacteriaceae	Fusobacterium		OTU2883	Bacteria	Firmicutes	Clostridia	Oscillospirales	[Eubacterium]	NA
	OTU4070	Bacteria	Firmicutes	Bacilli	Staphylococcales	Staphylococcaceae	Staphylococcus		OTU1324	Bacteria	Bacteroidota	Bacteroidia	Flavobacteriales	Flavobacteriaceae	Flavobacterium		OTU1793	Bacteria	Firmicutes	Clostridia	Lachnospirales	Lachnospiraceae	Lachnospiraceae
	OTU2203	Bacteria	Proteobacteria	Gammaproteobacteria	Enterobacterales	Pasteurellaceae	Histophilus		OTU1011	Bacteria	Proteobacteria	Gammaproteobacteria	Xanthomonadales	Rhodanobacteraceae	Dyella		OTU4067	Bacteria	Firmicutes	Clostridia	Oscillospirales	Oscillospiraceae	UCG-005
																	OTU1962	Bacteria	Bacteroidota	Bacteroidia	Bacteroidales	Rikenellaceae	Rikenellaceae
																	OTU3828	Bacteria	Firmicutes	Clostridia	Peptostreptococcales-Tissierellales	Peptostreptococcaceae	Romboutsia
																	OTU4516	Bacteria	Firmicutes	Clostridia	Christensenellales	Christensenellaceae	Christensenellaceae
																	OTU3417	Archaea	Euryarchaeota	Methanobacteria	Methanobacteriales	Methanobacteriaceae	Methanobrevibacter
																	OTU1145	Bacteria	Firmicutes	Bacilli	Staphylococcales	Staphylococcaceae	Staphylococcus
																	OTU3687	Bacteria	Bacteroidota	Bacteroidia	Bacteroidales	Prevotellaceae	Prevotellaceae
																	OTU4531	Bacteria	Firmicutes	Clostridia	Lachnospirales	Lachnospiraceae	NA
																	OTU4002	Bacteria	Bacteroidota	Bacteroidia	Bacteroidales	Bacteroidaceae	Bacteroides
																	OTU2043	Bacteria	Proteobacteria	Gammaproteobacteria	Pseudomonadales	Moraxellaceae	Acinetobacter
																	OTU2482	Bacteria	Proteobacteria	Alphaproteobacteria	Rhizobiales	Beijerinckiaceae	Methylobacterium-Methylorubrum
																	OTU2464	Bacteria	Bacteroidota	Bacteroidia	Bacteroidales	Rikenellaceae	Alistipes
																	OTU4507	Bacteria	Firmicutes	Bacilli	RF39	uncultured	NA
